# Supplementary material
Source: PubMed Central journal article supplement (PMC6581160)
Supplement: AEM.00369-19-s0009.pdf [file AEM.00369-19-s0009.pdf]

## Supplemental Information

### SI Figures

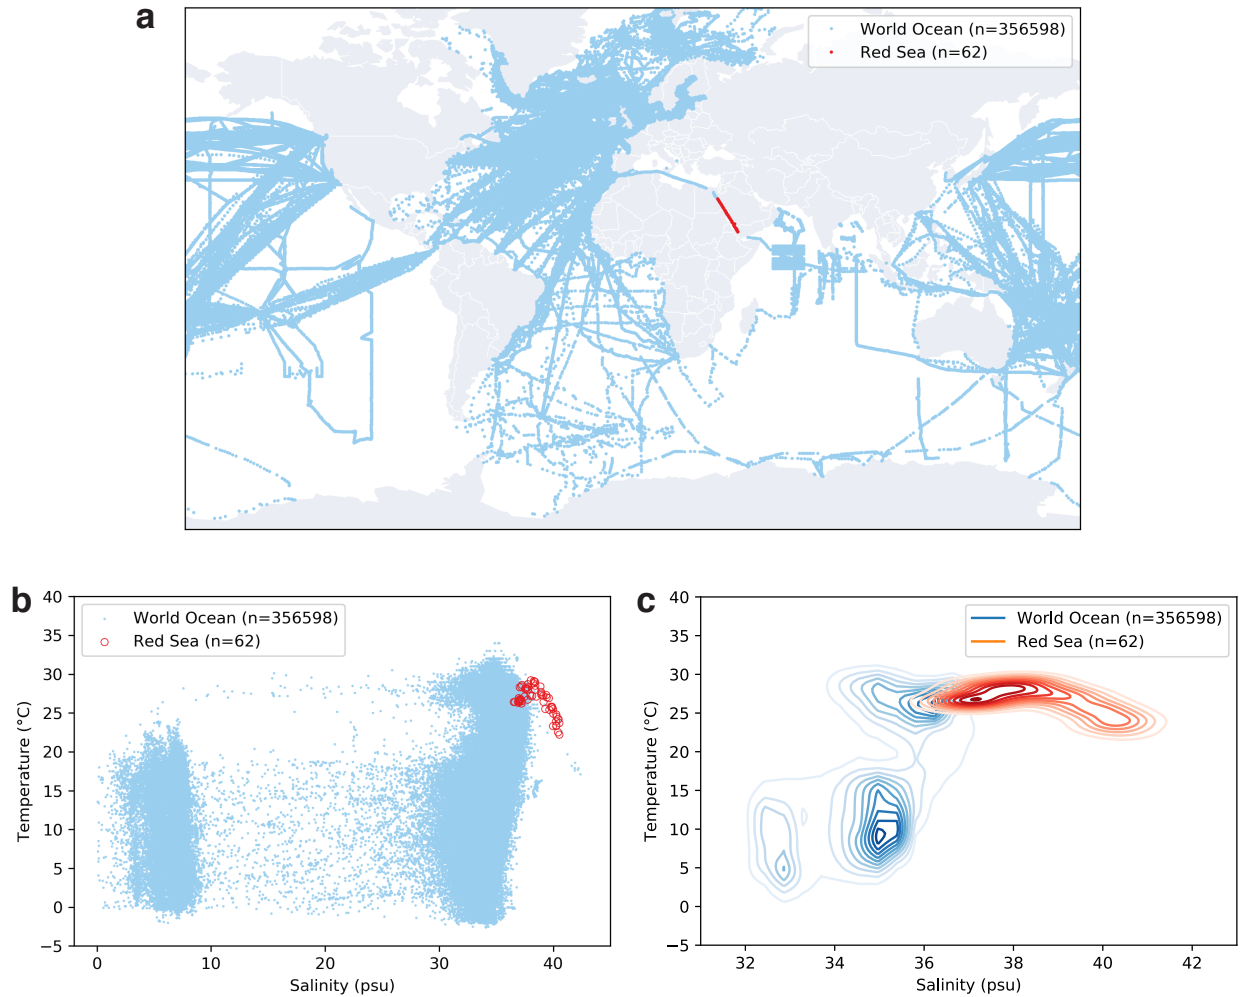

**Figure S1.** Temperature versus salinity relationships in the World Ocean Database 2013 (WOD13) colored by Red Sea or World Ocean excluding the Red Sea (World Ocean). (a) Map of samples in WOD13, with Red Sea samples ( $n=62$ ) in red. (b) Scatter plot of all points in WOD13, which spans from 1900 to 2010, and which includes a minority proportion of samples with salinities less than typical seawater (6% of samples  $<20$  psu). (c) Kernel density estimate (KDE) contour plot of those same samples, which shows the bivariate distribution of samples not visible in (b). Note that the majority of points have salinity  $>32$  psu and therefore empty sections of the KDE plot were cropped in (c) (note the  $x$ -scales). Both (b) and (c) show that the temperature-salinity distributions of Red Sea and World Ocean (non-Red Sea) samples are distinct, with Red Sea samples existing at the high end of global temperature distribution and extending beyond the non-Red Sea global salinity distribution.

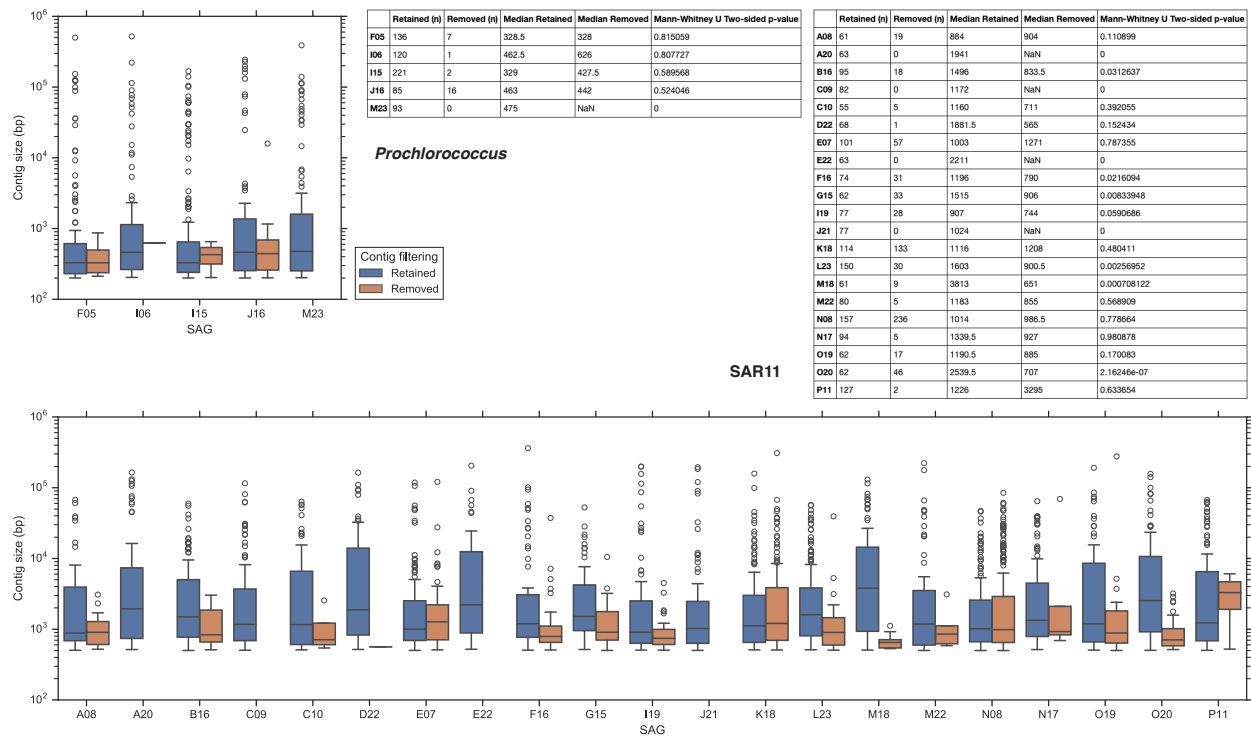

**Figure S2.** Contig size distributions of retained and removed contigs in the filtering of possible contamination from SAG assemblies. Boxplots show the median, interquartile range (IQR), and  $1.5 \times \text{IQR}$  (with outliers). Tables show, for each contig, the number  $n$  of contigs retained and removed, the median retained and removed contig size, and the Mann–Whitney U two-sided  $p$ -value comparing the distributions of retained and removed contig sizes.

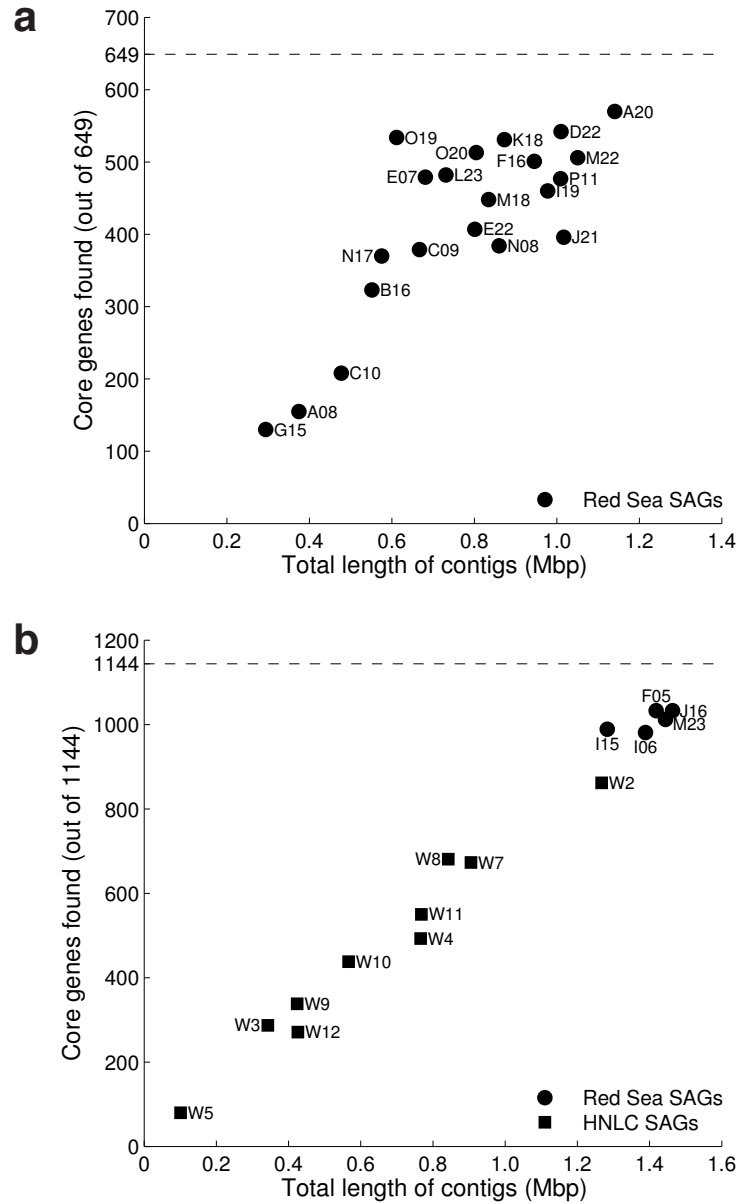

**Figure S3.** Completeness of (a) SAR11 and (b) *Prochlorococcus* single-cell amplified genomes (SAGs) based on the number of single-copy core genes. Completeness of *Prochlorococcus* SAGs was generally higher than SAR11 SAGs.

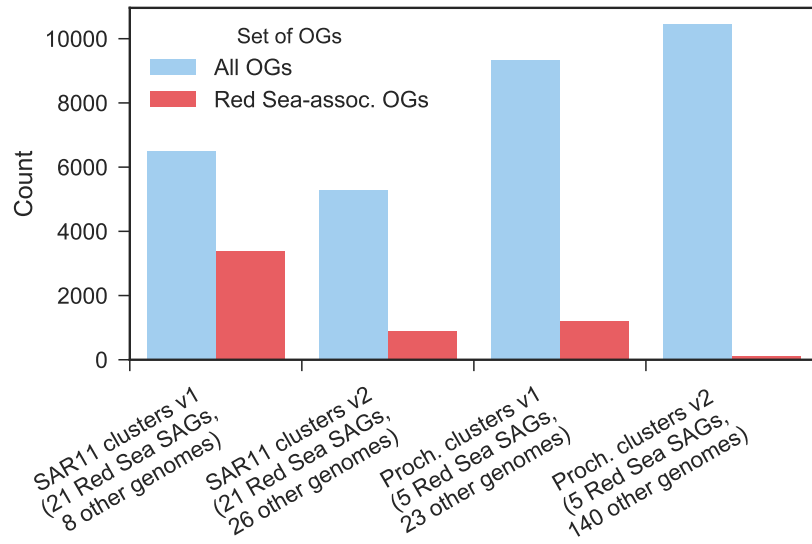

**Figure S4.** Bar chart showing number of the number of ortholog groups (OGs) identified in two versions of clustering and how many OGs were Red-Sea-associated (found only in the Red Sea genomes). As more genomes are added to the clustering, the number of OGs found only in Red Sea SAGs approaches zero.

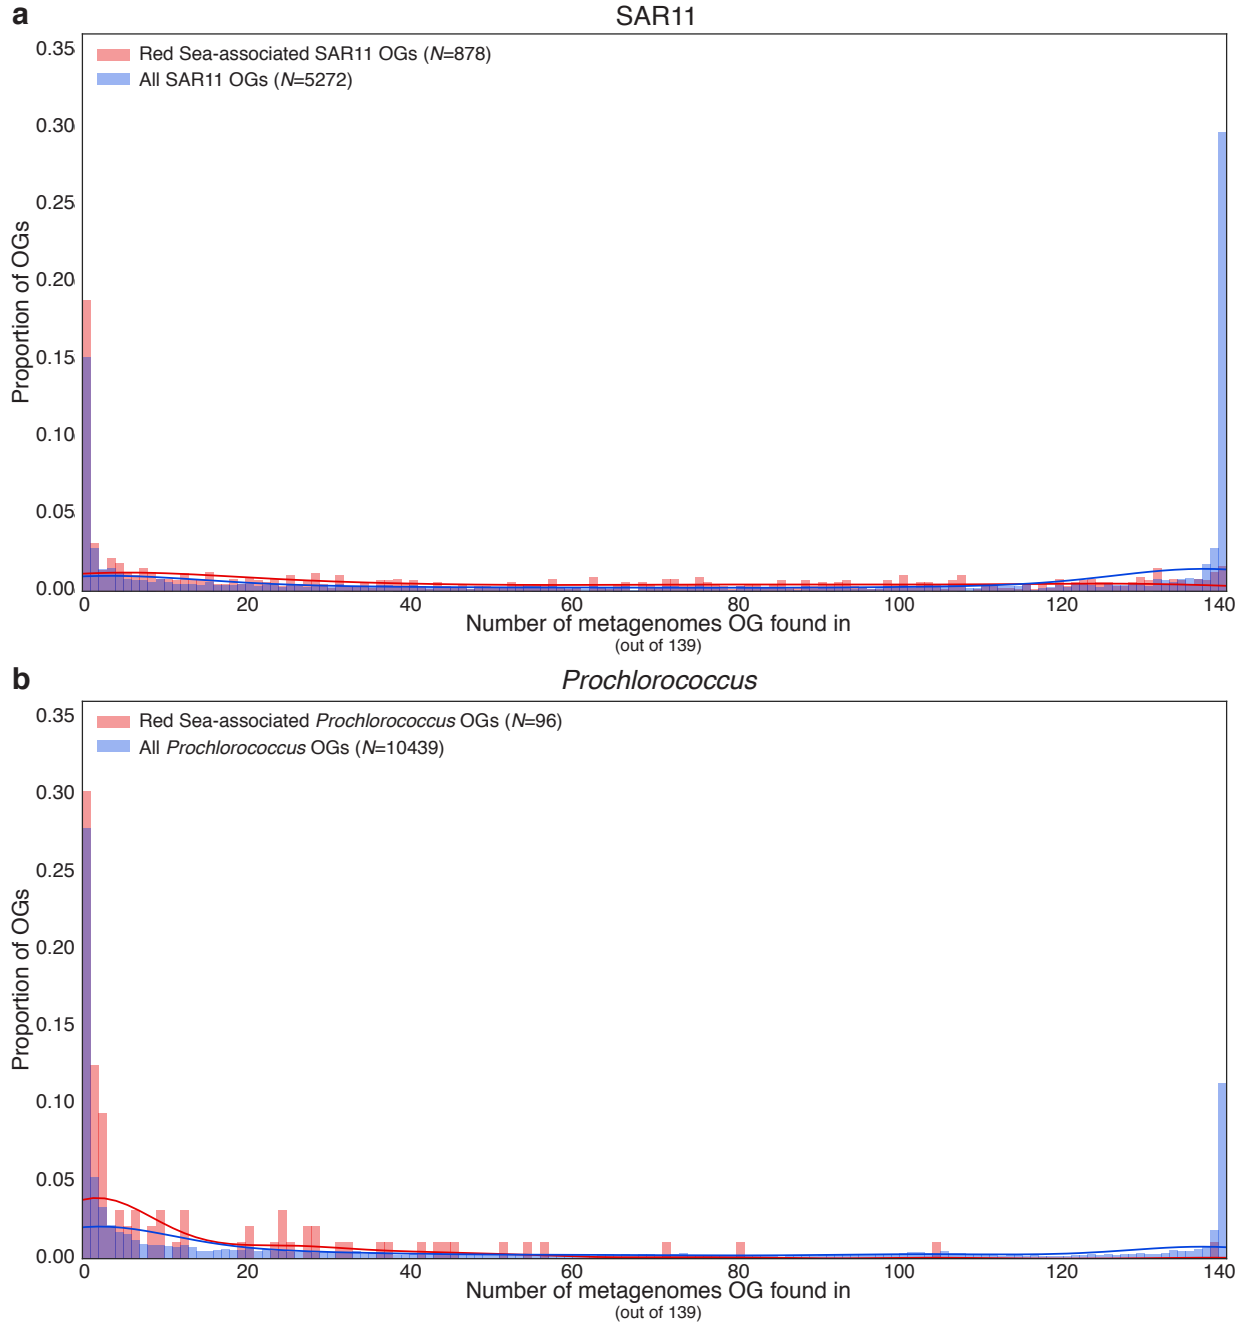

**Figure S5.** Histograms (bars) and kernel density estimates (lines) showing the distribution of (a) SAR11 and (b) *Prochlorococcus* OGs (all and Red-Sea-associated) by the number of *Tara* Oceans metagenomes they were found in. Red-Sea-associated OGs were less likely to be found in a high proportion of metagenomes than all OGs and were 10–20% more likely to not be found in any metagenome.

## SI Tables

**Table S1.** Properties of reference genomes of *Prochlorococcus* and SAR11. These include genomes used for phylogenetic trees and PCA ordination. Additional genomes were included for OG clustering and are provided in supplementary file 1.

| Genus                  | Strain   | Location                       | Clade  | Size (bp) | G+C (%) | Accession no. | Alternate accession no.  | Completeness (CheckM, %) | Redundancy (CheckM, %) |
|------------------------|----------|--------------------------------|--------|-----------|---------|---------------|--------------------------|--------------------------|------------------------|
| <i>Prochlorococcus</i> | MED4     | Mediterranean Sea, 5 m         | HL I   | 1657990   | 30.8    | NC_005072     |                          | 99.5                     | 0.27                   |
| <i>Prochlorococcus</i> | MIT9515  | Equatorial Pacific, 15 m       | HL I   | 1704176   | 30.8    | NC_008817     |                          | 100.0                    | 0.00                   |
| <i>Prochlorococcus</i> | AS9601   | Arabian Sea, 50 m              | HL II  | 1669886   | 31.3    | NC_008816     |                          | 99.6                     | 0.00                   |
| <i>Prochlorococcus</i> | MIT9202  | South Pacific, 79 m            | HL II  | 1691453   | 31.1    | NZ_DS999537   | NZ_ACDW00000000.scaffold | 98.8                     | 0.27                   |
| <i>Prochlorococcus</i> | MIT9215  | Equatorial Pacific, surface    | HL II  | 1738790   | 31.2    | NC_009840     |                          | 99.7                     | 0.27                   |
| <i>Prochlorococcus</i> | MIT9301  | Sargasso Sea, 90 m             | HL II  | 1641879   | 31.3    | NC_009091     |                          | 99.5                     | 0.00                   |
| <i>Prochlorococcus</i> | MIT9312  | Gulf Stream, 135 m             | HL II  | 1709204   | 31.2    | NC_007577     |                          | 99.7                     | 0.00                   |
| <i>Prochlorococcus</i> | NATL1A   | Northern Atlantic, 30 m        | LL I   | 1864731   | 35.0    | NC_008819     |                          | 99.7                     | 0.00                   |
| <i>Prochlorococcus</i> | NATL2A   | Northern Atlantic, 10 m        | LL I   | 1842899   | 35.1    | NC_007335     |                          | 99.5                     | 0.00                   |
| <i>Prochlorococcus</i> | SS120    | Sargasso Sea, 120 m            | LL II  | 1751080   | 36.4    | NC_005042     |                          | 100.0                    | 0.00                   |
| <i>Prochlorococcus</i> | MIT9211  | Equatorial Pacific, 83 m       | LL III | 1688963   | 38.0    | NC_009976     |                          | 99.7                     | 0.00                   |
| <i>Prochlorococcus</i> | MIT9303  | Sargasso Sea, 100 m            | LL IV  | 2682807   | 50.0    | NC_008820     |                          | 100.0                    | 0.14                   |
| <i>Prochlorococcus</i> | MIT9313  | Gulf Stream, 135 m             | LL IV  | 2410873   | 50.7    | NC_005071     |                          | 99.5                     | 0.14                   |
| SAR11                  | HTCC7211 | Sargasso Sea, open-ocean       | Ia     | 1456888   | 29.0    | NZ_DS995298   | NZ_ABVS00000000.scaffold | 100.0                    | 0.47                   |
| SAR11                  | HTCC9565 | N. Pacific, Oregon, open-ocean | Ia     | 1279674   | 29.0    | SRX037743     | PRJNA278082              | 99.1                     | 0.00                   |
| SAR11                  | HIMB5    | N. Pacific, Hawaii, coastal    | Ia     | 1343202   | 28.6    | NC_018643     |                          | 61.4                     | 0.00                   |
| SAR11                  | HTCC1002 | N. Pacific, Oregon, coastal    | Ia     | 1322994   | 29.7    | NZ_CH724130   | NZ_AAPV00000000.scaffold | 100.0                    | 0.47                   |
| SAR11                  | HTCC1062 | N. Pacific, Oregon, coastal    | Ia     | 1308759   | 29.7    | NC_007205     |                          | 100.0                    | 0.47                   |
| SAR11                  | HIMB114  | N. Pacific, Hawaii, coastal    | IIIa   | 1237371   | 29.6    | NZ_GG704918   | NZ_ADAC00000000.scaffold | 98.8                     | 2.38                   |
| SAR11                  | IMCC9063 | Arctic Ocean, Norway, coastal  | IIIa   | 1284727   | 31.7    | NC_015380     |                          | 98.8                     | 0.00                   |
| SAR11                  | HIMB59   | N. Pacific, Hawaii, coastal    | Va     | 1410127   | 32.3    | NC_018644     |                          | 88.6                     | 0.00                   |

**Table S2.** OGs found only in Red Sea single-cell genomes that are annotated as something other than “hypothetical protein”. All non-hypothetical RS-OGs including singletons are provided in supplemental file 2. OG descriptions are provided in supplemental file 4.

| Genus                  | OG number  | OG size | Example SAG | Example description                                                                    | Example protein         |
|------------------------|------------|---------|-------------|----------------------------------------------------------------------------------------|-------------------------|
| <i>Prochlorococcus</i> | proch20358 | 1       | PI06        | Methionine import ATP-binding protein MetN                                             | Proch_AAA795-I06_00177  |
| <i>Prochlorococcus</i> | proch20359 | 1       | PI06        | Ubiquinone/menaquinone biosynthesis C-methyltransferase UbiE                           | Proch_AAA795-I06_00179  |
| <i>Prochlorococcus</i> | proch20363 | 1       | PI06        | Ubiquinone/menaquinone biosynthesis C-methyltransferase UbiE                           | Proch_AAA795-I06_00210  |
| <i>Prochlorococcus</i> | proch20373 | 1       | PI15        | GDP-perosamine synthase                                                                | Proch_AAA795-I15_00082  |
| <i>Prochlorococcus</i> | proch20377 | 1       | PI15        | tRNA-2-methylthio-N(6)-dimethylallyladenine synthase                                   | Proch_AAA795-I15_00146  |
| <i>Prochlorococcus</i> | proch20394 | 1       | PJ16        | Inner membrane protein Yhal                                                            | Proch_AAA795-J16_00432  |
| <i>Prochlorococcus</i> | proch20409 | 1       | PJ16        | UDP-4-amino-4-deoxy-L-arabinose--oxoglutarate aminotransferase                         | Proch_AAA795-J16_01544  |
| <i>Prochlorococcus</i> | proch20421 | 1       | PM23        | Glucosylglycerol-phosphate synthase                                                    | Proch_AAA795-M23_01055  |
| <i>Prochlorococcus</i> | proch20425 | 1       | PM23        | UvrABC system protein B                                                                | Proch_AAA795-M23_01207  |
| SAR11                  | pelag11768 | 5       | SB16        | N-acylneuraminate cytidyltransferase                                                   | Pelagi_AAA795-B16_00606 |
| SAR11                  | pelag11869 | 4       | SA20        | Guanidinopropionase                                                                    | Pelagi_AAA795-A20_00614 |
| SAR11                  | pelag11963 | 4       | SB16        | Alkyl hydroperoxide reductase AhpD                                                     | Pelagi_AAA795-B16_00388 |
| SAR11                  | pelag11968 | 3       | SF16        | Formate dehydrogenase                                                                  | Pelagi_AAA795-F16_00091 |
| SAR11                  | pelag12057 | 3       | SG15        | sn-glycerol-3-phosphate import ATP-binding protein UgpC                                | Pelagi_AAA795-G15_00156 |
| SAR11                  | pelag12189 | 2       | SF16        | Fimbrial protein                                                                       | Pelagi_AAA795-F16_00208 |
| SAR11                  | pelag12217 | 2       | SA08        | N-acylneuraminate cytidyltransferase                                                   | Pelagi_AAA795-A08_00237 |
| SAR11                  | pelag12258 | 2       | SL23        | ATP synthase subunit alpha                                                             | Pelagi_AAA795-L23_00301 |
| SAR11                  | pelag12412 | 2       | SB16        | 4-methylaminobutanoate oxidase (formaldehyde-forming)                                  | Pelagi_AAA795-B16_00337 |
| SAR11                  | pelag12623 | 2       | SA08        | GDP-perosamine synthase                                                                | Pelagi_AAA795-A08_00275 |
| SAR11                  | pelag12658 | 2       | SI19        | Alcohol dehydrogenase                                                                  | Pelagi_AAA797-I19_00217 |
| SAR11                  | pelag12665 | 2       | SM18        | Bifunctional homocysteine S-methyltransferase/5,10-methylenetetrahydrofolate reductase | Pelagi_AAA795-M18_01040 |
| SAR11                  | pelag12668 | 2       | SC09        | Inositol 2-dehydrogenase/D-chiro-inositol 3-dehydrogenase                              | Pelagi_AAA795-C09_00458 |
| SAR11                  | pelag12669 | 2       | SC09        | 3-oxoacyl-[acyl-carrier-protein] reductase FabG                                        | Pelagi_AAA795-C09_00465 |
| SAR11                  | pelag12679 | 2       | SD22        | DNA polymerase I                                                                       | Pelagi_AAA795-D22_00674 |
| SAR11                  | pelag12688 | 2       | SE07        | 4-hydroxy-3-methylbut-2-en-1-yl diphosphate synthase (ferredoxin)                      | Pelagi_AAA795-E07_00143 |
| SAR11                  | pelag12700 | 2       | SM18        | Heparin-sulfate lyase                                                                  | Pelagi_AAA795-M18_00113 |
| SAR11                  | pelag12701 | 2       | SI19        | 4-hydroxy-tetrahydrodipicolinate synthase                                              | Pelagi_AAA797-I19_00542 |
| SAR11                  | pelag12703 | 2       | SK18        | Inositol 2-dehydrogenase                                                               | Pelagi_AAA795-K18_00566 |
| SAR11                  | pelag12707 | 2       | SM18        | putative GTP-binding protein YjiA                                                      | Pelagi_AAA795-M18_00527 |
| SAR11                  | pelag12710 | 2       | SM22        | Phosphoribosylglycinamide formyltransferase                                            | Pelagi_AAA795-M22_00022 |
| ...                    | ...        | ...     | ...         | ...                                                                                    | ...                     |





**Table S4.** OGs driving separation in principal components analysis (PCA) of *Tara* Oceans surface samples based on *Prochlorococcus* and SAR11 OG abundances. These OGs were among the top 50 variables driving PCA separation of samples. Hypothetical proteins have been omitted from this list. OG descriptions are provided in supplemental file 4.

| <b>Genus</b>           | <b>OG number</b> | <b>Description</b>                                                                   |
|------------------------|------------------|--------------------------------------------------------------------------------------|
| <i>Prochlorococcus</i> | proch10265       | LPS-assembly protein LptD                                                            |
| <i>Prochlorococcus</i> | proch11818       | Intimin                                                                              |
| <i>Prochlorococcus</i> | proch10782       | LexA repressor                                                                       |
| <i>Prochlorococcus</i> | proch12059       | Outer membrane protein PagN                                                          |
| <i>Prochlorococcus</i> | proch11343       | Undecaprenyl phosphate-alpha-4-amino-4-deoxy-L-arabinose arabinosyl transferase      |
| <i>Prochlorococcus</i> | proch11663       | Tyrosine-protein kinase ptk                                                          |
| <i>Prochlorococcus</i> | proch12291       | Beta-barrel assembly-enhancing protease                                              |
| <i>Prochlorococcus</i> | proch11496       | Lipopolysaccharide assembly protein A                                                |
| <i>Prochlorococcus</i> | proch11401       | Lipopolysaccharide export system protein LptC                                        |
| <i>Prochlorococcus</i> | proch12161       | Phycoerythrin class 2 subunit gamma, linker polypeptide                              |
| <i>Prochlorococcus</i> | proch12010       | C-phycoerythrin class 1 subunit alpha                                                |
| SAR11                  | pelag10168       | 4-hydroxythreonine-4-phosphate dehydrogenase 2                                       |
| SAR11                  | pelag10710       | Lipopolysaccharide export system permease protein LptG                               |
| SAR11                  | pelag11313       | 2-O-methyltransferase Noel                                                           |
| SAR11                  | pelag11257       | putative undecaprenyl-phosphate N-acetylglucosaminyl 1-phosphate transferase         |
| SAR11                  | pelag11434       | UDP-N,N'-diacetylbacillosamine 2-epimerase (hydrolyzing)                             |
| SAR11                  | pelag11679       | Putative polysaccharide biosynthesis protein with aminopeptidase-like domain protein |
| SAR11                  | pelag10704       | Heterocyst differentiation ATP-binding protein HepA                                  |
| SAR11                  | pelag11235       | CDP-glucose 4,6-dehydratase                                                          |
| SAR11                  | pelag11593       | putative adenylyl-sulfate kinase                                                     |
| SAR11                  | pelag11308       | 23S rRNA (guanine(745)-N(1))-methyltransferase                                       |
| SAR11                  | pelag11653       | Phosphoribosylglycinamide formyltransferase                                          |
| SAR11                  | pelag11002       | CMP-N,N'-diacetyllegionaminic acid synthase                                          |
| SAR11                  | pelag11422       | dTDP-glucose 4,6-dehydratase                                                         |
| SAR11                  | pelag11743       | GDP-6-deoxy-D-talose 4-dehydrogenase                                                 |
| SAR11                  | pelag11212       | Undecaprenyl-phosphate alpha-N-acetylglucosaminyl 1-phosphate transferase            |
| SAR11                  | pelag11890       | Peptidoglycan-N-acetylglucosamine deacetylase                                        |
| SAR11                  | pelag11566       | Inner membrane ABC transporter permease protein YcjO                                 |
| SAR11                  | pelag11963       | Alkyl hydroperoxide reductase AhpD                                                   |
| SAR11                  | pelag11958       | GDP-mannose-dependent alpha-mannosyltransferase                                      |
| SAR11                  | pelag14916       | Chitinase A                                                                          |

## Supplemental Material

Supplemental file 1 – Metadata of genomes used for analyses and OG clustering: strain, genus, code (for OG clustering), clade, Red Sea or not (True/False), latitude, longitude, depth in meters where isolated, type (Cultured/SAG), strain short name (without “Pro\_” or “SAR11\_”), and reference. genome\_metadata.xlsx

Supplemental file 2 – Full version of Table S2. tableS2\_red\_sea\_assoc\_non\_hypothetical.xlsx

Supplemental file 3 – Full version of Table S3. tableS3\_tara\_best\_case\_scenarios.xlsx

Supplemental file 4 – Metadata of OGs: OG number, number of genomes found in, example accession number, description of function, Red-Sea-associated (True/False), and genus. og\_metadata.xlsx

Supplemental file 5 – Genome OG counts: counts per genome of SAR11 OGs. og\_table\_sar.xlsx

Supplemental file 6 – Genome OG counts: counts per genome of *Prochlorococcus* OGs. og\_table\_pro.xlsx

Supplemental file 7 – *Tara* OG counts: counts per *Tara* metagenome of SAR11 OGs. tara\_counts\_sar.xlsx

Supplemental file 8 – *Tara* OG counts: counts per *Tara* metagenome of *Prochlorococcus* OGs. tara\_counts\_pro.xlsx

Protein sequence identifiers and FASTA sequences for each OG have been archived at <https://zenodo.org> with DOI 10.5281/zenodo.2634561.
